# Supplementary material
Source: MDPI journal article supplement (https://www.mdpi.com/2297-8739/10/12/601)
Supplement: s1 [file s1]

## Supplementary Materials

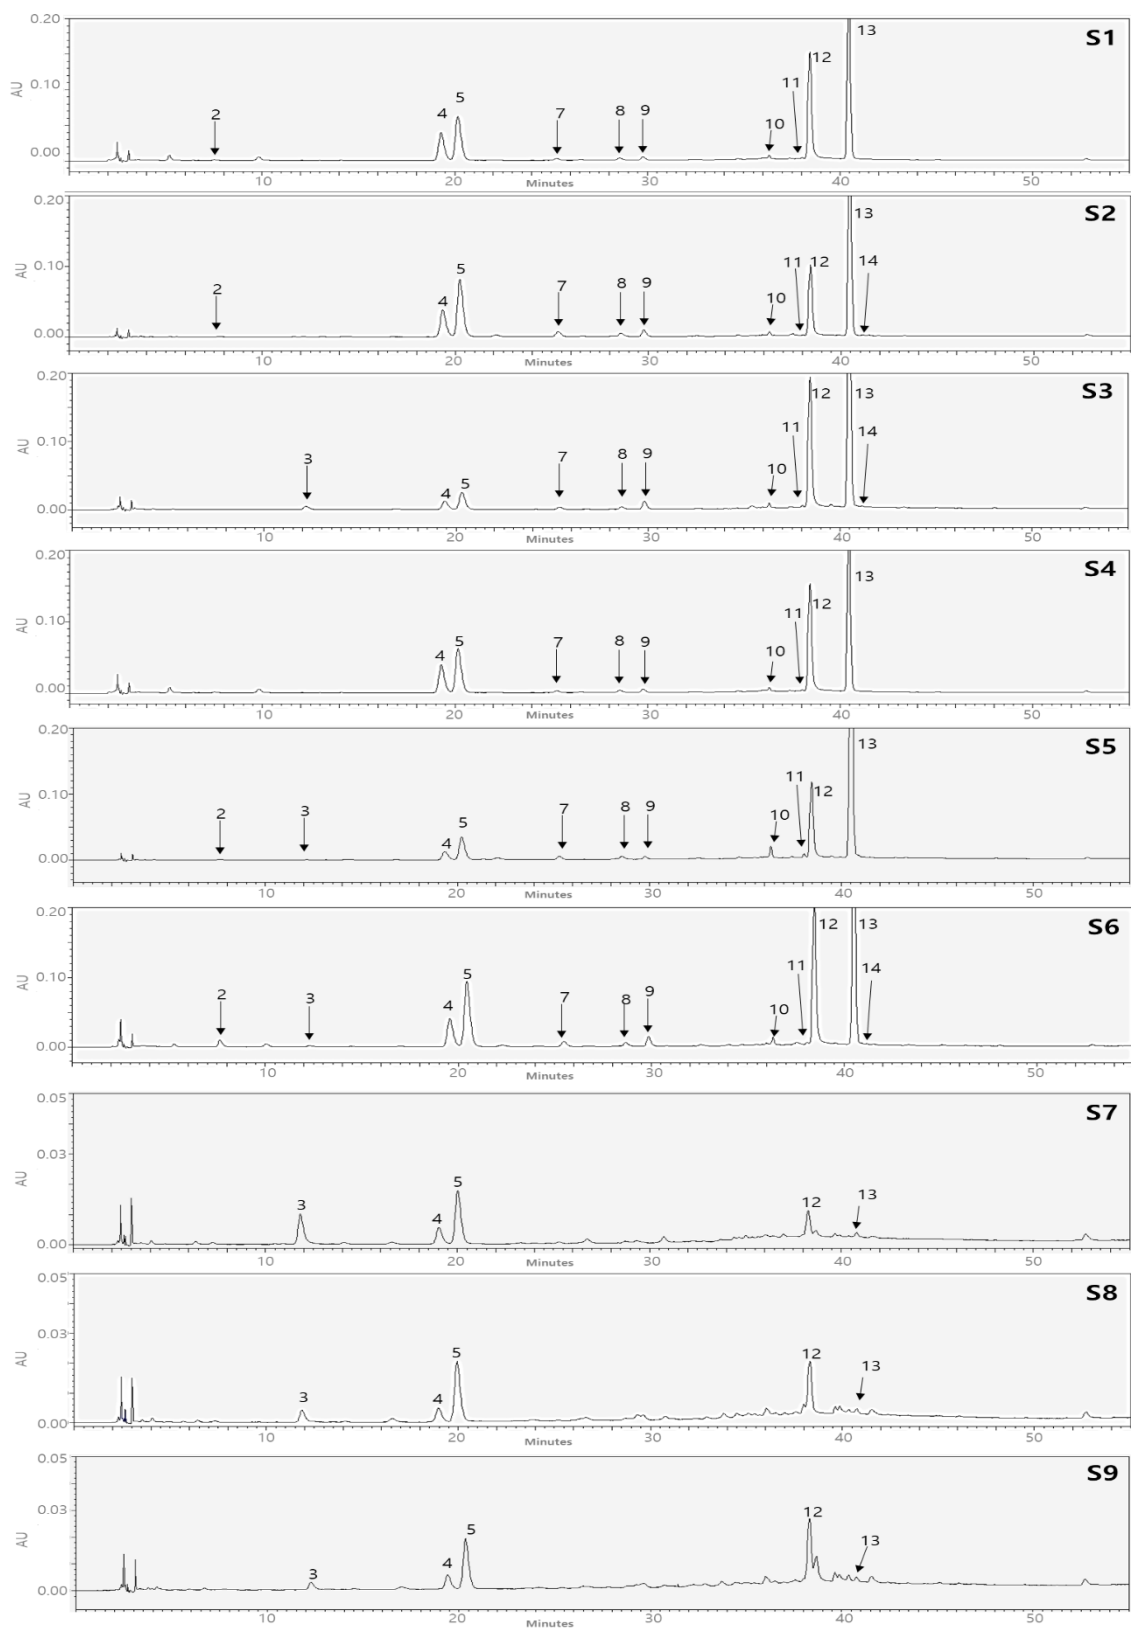

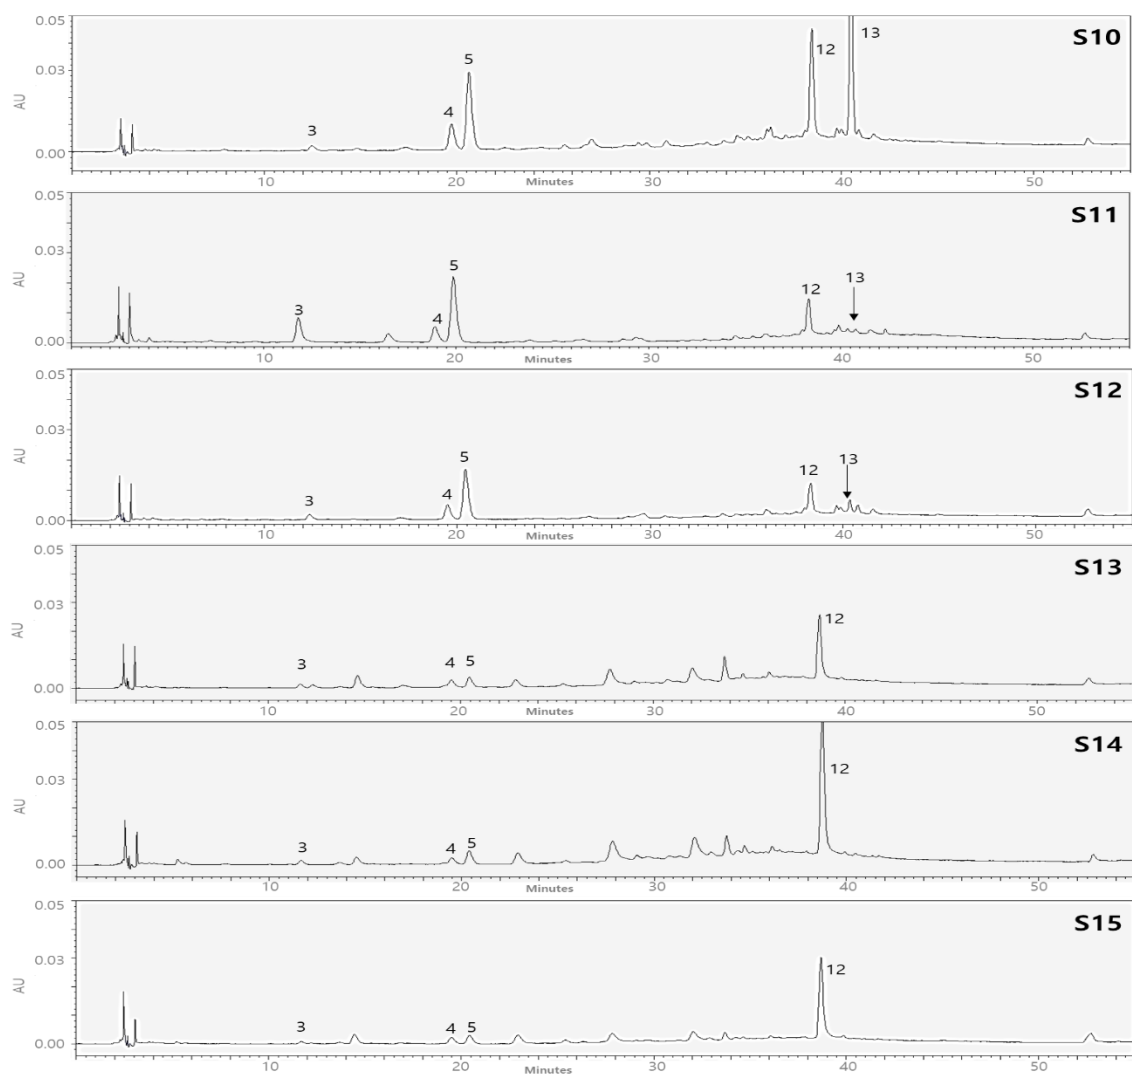

**Figure S1.** HPLC chromatograms of *D. fortunei*, *D. mollis*, and *D. mariesii* samples.

2: compound 2, 3: compound 3, 4: compound 4, 5: compound 5, 7: compound 7, 8: compound 8, 9: compound 9, 10: compound 10, 11: compound 11, 12: compound 12, 13: compound 13, 14: compound 14, S1: Sample 1, S2: Sample 2, S3: Sample 3, S4: Sample 4, S5: Sample 5, S6: Sample 6, S7: Sample 7, S8: Sample 8, S9: Sample 9, S10: Sample 10, S11: Sample 11, S12: Sample 12, S13: Sample 13, S14: Sample 14, S15: Sample 15

**Table S1.** NMR and mass spectrometry data of 14 compounds isolated from *D. fortunei*.

| Analyte    | NMR and mass spectrometry data                                                                                                                                                                                                                                                                                                                                                                                                                                                                                                                                                                                                                                                                                                                                                                      |
|------------|-----------------------------------------------------------------------------------------------------------------------------------------------------------------------------------------------------------------------------------------------------------------------------------------------------------------------------------------------------------------------------------------------------------------------------------------------------------------------------------------------------------------------------------------------------------------------------------------------------------------------------------------------------------------------------------------------------------------------------------------------------------------------------------------------------|
| Compound 1 | C <sub>7</sub> H <sub>6</sub> O <sub>5</sub> ; ESI/LTQ-Orbitrap-HRMS m/z: 169.0125 [M – H] <sup>–</sup> , <sup>1</sup> H-NMR (600 MHz, CD <sub>3</sub> OD-d <sub>4</sub> ) δ: 7.05(2H,s,Ar-H); <sup>13</sup> C-NMR (150 MHz, CD <sub>3</sub> OD-d <sub>4</sub> ) δ: 170.38(C=O), 146.36(C-3,5), 139.57(C-4), 121.95(C-1), 110.31 (C-2,6).                                                                                                                                                                                                                                                                                                                                                                                                                                                           |
| Compound 2 | C <sub>6</sub> H <sub>6</sub> O <sub>3</sub> ; ESI/LTQ-Orbitrap-HRMS m/z: 127.0397 [M + H] <sup>+</sup> , <sup>1</sup> H-NMR (600 MHz, CDCl <sub>3</sub> -d) δ: 9.50(1H,s,H-1), 7.14(1H,d,J=3.6Hz,H-4), 6.44(1H,d,J=4.2Hz,H-3), 4.63 (2H,s,H-6), 3.34(1H,brs,OH); <sup>13</sup> C-NMR (150 MHz, CDCl <sub>3</sub> -d) δ: 178.63(C-1), 161.58(C-2), 153.35(C-5), 110.94(C-4), 58.60(C-6).                                                                                                                                                                                                                                                                                                                                                                                                            |
| Compound 3 | C <sub>7</sub> H <sub>6</sub> O <sub>4</sub> ; ESI/LTQ-Orbitrap-HRMS: 153.0178 [M – H] <sup>–</sup> , <sup>1</sup> H-NMR (600 MHz, CD <sub>3</sub> OD-d <sub>4</sub> ) δ: 7.43-7.41(2H,m,Ar-H), 6.79(1H,d,J=8.3Hz,Ar-H) ; <sup>13</sup> C-NMR (150 MHz, CD <sub>3</sub> OD-d <sub>4</sub> ) δ: 170.50(C-7), 151.39(C-4), 146.02(C-3), 123.85(C-1), 123.52(C-6), 117.75(C-2), 115.74(C-5).                                                                                                                                                                                                                                                                                                                                                                                                           |
| Compound 4 | C <sub>15</sub> H <sub>18</sub> O <sub>8</sub> ; UPLC/QTOP-MS: 371.0959 [M + HCOOH – H] <sup>–</sup> , 325.0909 [M – H] <sup>–</sup> , ESI/LTQ-Orbitrap-HRMS: 371.0963 [M + HCOOH – H] <sup>–</sup> , 325.0911 [M – H] <sup>–</sup> , <sup>1</sup> H-NMR (600 MHz, CD <sub>3</sub> OD-d <sub>4</sub> ) δ: 7.46(2H,d,J=9Hz,H-2,H-6), 7.44(1H,d,J=16.2Hz,H-7), 7.07(2H,d,J=9Hz,H-3,H-5), 6.38(1H,d,J=16.2Hz,H-8), 4.94(1H,d,J=7.8Hz,H-1'), 3.89(1H,dd,J=12.2,4Hz,H-6'a), 3.37(1H,dd,J=12.5,4Hz,H-6'b), 3.51-3.36(4H,m,H-2',3',4',5'); <sup>13</sup> C-NMR (150 MHz, CD <sub>3</sub> OD-d <sub>4</sub> ) δ: 176.59(C-9), 159.66(C-4), 141.37(C-7), 130.89(C-1), 129.69(C-2,6), 117.68(C-8), 117.60(C-3,5), 101.67(C-1'), 77.87(C-3'), 77.63(C-5'), 74.57(C-2'), 71.04(C-4'), 62.18(C-6').              |
| Compound 5 | C <sub>15</sub> H <sub>18</sub> O <sub>9</sub> ; UPLC/QTOF-MS m/z : 341.0847 [M – H] <sup>–</sup> , ESI/LTQ-Orbitrap-HRMS: 341.0857 [M – H] <sup>–</sup> , <sup>1</sup> H-NMR (600 MHz, CD <sub>3</sub> OD-d <sub>4</sub> ) δ: 7.48(1H,d,J=16.2Hz,H-7), 7.18(1H,d,J=8.4Hz,H-5), 7.08(1H,d,J=1.2Hz,H-2), 7.01(1H,dd,J=8.4,1.5Hz,H-6), 6.32(1H,d,J=15Hz,H-8), 4.91(1H,d,J=4.8Hz,H-1'), 3.90(1H,dd,J=12.1,8, H-6a), 3.71(1H,dd,J=12.6, 5.4Hz,H-6b), 3.39-3.52(4H,m,H-2',3',4',5') <sup>13</sup> C-NMR (150MHz, CD <sub>3</sub> OD-d <sub>4</sub> ) δ: 148.51(C-4), 148.47(C-3), 144.64(C-7), 131.65(C-1), 121.84(C-6), 119.92(C-5), 118.23(C-8), 115.736(C-2), 103.62(C-1'), 78.38(C-3'), 77.55(C-5'), 74.9(C-2'), 71.29(C-4'), 62.40(C-6')                                                            |
| Compound 6 | C <sub>7</sub> H <sub>6</sub> O <sub>3</sub> ; ESI/LTQ-Orbitrap-HRMS: 137.0223 [M – H] <sup>–</sup> , <sup>1</sup> H-NMR (600 MHz, CD <sub>3</sub> OD-d <sub>4</sub> ) δ: 7.87 (2H, m, J=6.6, 4.4 Hz, H-3, 5); 6.81 (2H, m, J=7.2, 2.4 Hz, H-2, 6), <sup>13</sup> C-NMR (150 MHz, CD <sub>3</sub> OD-d <sub>4</sub> ) δ: 170.21 (C-7), 163.50(C-4), 133.14 (C-3, 5), 122.83 (C-1), 116.17 (C-2, 6).                                                                                                                                                                                                                                                                                                                                                                                                 |
| Compound 7 | C <sub>16</sub> H <sub>20</sub> O <sub>9</sub> ; UPLC/QTOF-MS m/z : 355.1024 [M – H] <sup>–</sup> , ESI/LTQ-Orbitrap-HRMS: 401.1064 [M + HCOOH – H] <sup>–</sup> , 355.1014 [M – H] <sup>–</sup> , <sup>1</sup> H-NMR (600 MHz, CD <sub>3</sub> OD-d <sub>4</sub> ) δ: 7.33 (1H,d,J=16.0Hz,H-7), 7.17(1H,d,J=1.2Hz,H-2), 7.13(1H,d,J=8.4Hz,H-5), 7.06(1H,dd,J=8.4,1.8Hz,H-6), 6.40(1H,d,J=15.6Hz,H-8), 4.93(1H,d,J=7.8Hz,H-10), 3.87(1H,dd,J=11.4,1.2Hz,H-6b), 3.69(1H,dd,J=12.4,8Hz,H-6a), 3.51-3.38(4H,m,H-2',3',4',5'), <sup>13</sup> C-NMR (150MHz, CD <sub>3</sub> OD-d <sub>4</sub> ) δ: 171.06(COOH), 148.65(C-3), 148.49(C-4), 145.62(C-7), 131.31(C-1), 122.02(C-6), 118.48(C-8), 118.17(C-5), 115.88(C-2), 103.51(C-1'), 78.35(C-5'), 77.51(C-3'), 74.78(C-2'), 71.27(C-4'), 62.38(C-6'). |
| Compound 8 | C <sub>17</sub> H <sub>22</sub> O <sub>10</sub> ; UPLC/QTOF-MS m/z : 385.1131 [M – H] <sup>–</sup> , ESI/LTQ-Orbitrap-HRMS: 431.1170 [M + HCOOH – H] <sup>–</sup> , 385.1102 [M – H] <sup>–</sup> , <sup>1</sup> H-NMR (600 MHz, CD <sub>3</sub> OD-d <sub>4</sub> ) δ: 7.43(1H,d,J=15.6Hz,H-7), 6.87(2H,s,H-2,6), 6.43(1H,d,J=15.6Hz,H-8), 4.94(1H,dd=7.2,H-1'a), 3.88(6H,s,Me), 3.77(1H,m,H-6'a), 3.69(1H,m,H-6'b), 3.50-3.38(4H,m,H-2',3',4',5'); <sup>13</sup> C-NMR (150 MHz, CD <sub>3</sub> OD-d <sub>4</sub> ) δ: 170.66(C-9), 154.45(C-                                                                                                                                                                                                                                                    |

|             |                                                                                                                                                                                                                                                                                                                                                                                                                                                                                                                                                                                                                                                                                                                                                                                                                                                                                                                                                                                                                               |
|-------------|-------------------------------------------------------------------------------------------------------------------------------------------------------------------------------------------------------------------------------------------------------------------------------------------------------------------------------------------------------------------------------------------------------------------------------------------------------------------------------------------------------------------------------------------------------------------------------------------------------------------------------------------------------------------------------------------------------------------------------------------------------------------------------------------------------------------------------------------------------------------------------------------------------------------------------------------------------------------------------------------------------------------------------|
|             | 3,5), 143.34(C-7), 137.47(C-4), 133.13(C-1), 106.82(C-2,6), 105.00(C-1'), 78.35(C-3'), 77.78(C-5'), 75.66(C-2'), 71.29(C-4'), 62.42(C-6'), 57.12(C-OCH <sub>3</sub> ).                                                                                                                                                                                                                                                                                                                                                                                                                                                                                                                                                                                                                                                                                                                                                                                                                                                        |
| Compound 9  | C <sub>21</sub> H <sub>26</sub> O <sub>13</sub> ; UPLC/QTOF-MS m/z : 531.1338 [M + HCOOH – H] <sup>–</sup> , 485.1292 [M – H] <sup>–</sup> , ESI/LTQ-Orbitrap-HRMS m/z: 531.1332 [M + HCOOH – H] <sup>–</sup> , 485.1280 [M – H] <sup>–</sup> , <sup>1</sup> H-NMR (600 MHz, CD <sub>3</sub> OD-d <sub>4</sub> ) δ: 7.90(1H,d,J=6.0Hz,H-2), 6.23(1H,d,J=2.4Hz,H-8), 6.22(1H,d,J=1.8Hz,H-6), 6.15(1H,d,J=6.0Hz, H-2), 5.25(1H,d,J=1.8Hz,H-1'''), 5.09(1H,d,J=7.8Hz,H-1''), 3.93(1H,dd,J=1.8Hz,3.0Hz,H-2''), 3.81-3.86(1H,m,H-5''), 3.70(1H,dd,J=4.8Hz,12Hz,H-2'), 3.66-3.62(1H,m,H-6'), 3.60(1H,t,J=9.6Hz,H-3'), 3.52-3.55(1H,m,H-3''), 3.42-3.41(1H,m,H-5'), 3.40-3.37(1H,m,H-4'), 1.29(1H, d,J=5.6Hz,H-6'').                                                                                                                                                                                                                                                                                                                 |
| Compound 10 | C <sub>27</sub> H <sub>30</sub> O <sub>15</sub> ; UPLC/QTOF-MS m/z : 593.1519 [M – H] <sup>–</sup> , ESI/LTQ-Orbitrap-HRMS m/z: 593.1479 [M – H] <sup>–</sup> , <sup>1</sup> H-NMR (600 MHz, DMSO-d <sub>6</sub> ) δ: 7.80(2H,d,J=8.4Hz,H-2',6'), 6.93(2H,d,J=9.0Hz,H-3',5'), 6.75(1H,d,J=2.0Hz, H-8), 6.49(1H,d,J=1.8Hz,H-6), 5.40(1H,s,H-1''), 5.05(1H,d,J=7.2Hz,H-1'''), 4.22(1H,dd,J=2.4Hz,3.6Hz,H-4'''), 3.92(1H,dd,J=1.8Hz,12Hz,H-5''), 3.72-3.69(2H,m,H-6'',H-5'''), 3.54-3.47(2H,m,H-3'',2''), 3.40-3.35(2H,m,H-3'',2''), 3.34-3.32(1H,m,H-4''), 0.92(3H,d,J=6Hz,rhamnosylCH <sub>3</sub> ); <sup>13</sup> C-NMR (150 MHz, DMSO-d <sub>6</sub> ) δ: 177.78(C-4), 162.80(C-7), 160.76(C-5), 160.10(C-4'), 157.66(C-2), 155.96(C-9), 134.91(C-3), 130.53(C-2',6'), 120.12(C-1'), 115.29(C-3',5'), 105.619(C-10), 101.62(C-1''), 99.70(C-1'''), 99.19(C-6), 94.49(C-8), 77.04(C-5'''), 76.25(C-3'''), 72.96(C-2'''), 70.94(C-3''), 70.53(C-2''), 70.16(C-4''), 69.91(C-5''), 69.39(C-4''), 60.44(C-6'''), 17.330(C-6''). |
| Compound 11 | C <sub>26</sub> H <sub>28</sub> O <sub>15</sub> ; UPLC/QTOF-MS m/z : 579.1352 [M – H] <sup>–</sup> , ESI/LTQ-Orbitrap-HRMS m/z: 579.1431 [M – H] <sup>–</sup> , <sup>1</sup> H-NMR (600 MHz, DMSO-d <sub>6</sub> ) δ: 8.07(2H,d,J=9.0Hz,H-2', H-6'), 7.31(2H,d,J=7.2Hz,H-3',H-5'), 6.85(1H,d,J=7.8Hz,H-8),6.81(1H,d,J=8.4Hz,H-6), 5.63(1H,s,H-1'''), 5.28(1H,d,J=7.2Hz,H-1''), 4.07-4.05(1H,Brs,H-2'''), 4.01-3.99(1H,Brs,H-3'''), 3.92-3.84(1H,m,H-4''), 3.79/3.77(1H,m,H-5'''), 3.45(1H,brs,H-2''), 3.44(1H,brs,H-3''), 3.39(2H,brs,H-4'',H-5''), 3.69-3.65(1H,m,H-6'').                                                                                                                                                                                                                                                                                                                                                                                                                                                    |
| Compound 12 | C <sub>27</sub> H <sub>32</sub> O <sub>15</sub> ; UPLC/QTOF-MS m/z : 595.1682 [M – H] <sup>–</sup> , ESI/LTQ-Orbitrap-HRMS m/z: 595.1637 [M – H] <sup>–</sup> , <sup>1</sup> H-NMR (600 MHz, DMSO-d <sub>6</sub> ) δ: 12.04(1H,s,5-OH), 9.08(2H,br.s,H-3',4'-OH), 6.86(1H,d,8.4Hz,H-6'), 6.74(2H,d,J=4.8Hz,H-2',5'), 6.10-6.07(2H,m,H-6,8), 5.46-5.39(1H,m,H-2), 5.14-5.10(1H,m,H-1''), 5.10-5.08(1H,m,H-1'''), 3.22-3.71(10H,m,H-6'',5'',5'',3'',2'',2'',4'',4''), 3.20-3.09(1H,m,H-3a), 2.73-2.66(1H,m, H-3b), 1.14(3H,dd,J=2.4Hz, 6Hz, H-6'''); <sup>13</sup> C-NMR (150 MHz, DMSO-d <sub>6</sub> ) δ: 197.69(C-4), 165.37(C-7), 163.45(C-5), 163.22(C-9), 146.37(C-4'), 145.75(C-3'), 129.65(C-1'), 118.6(C-6'), 115.89(C-2'), 114.95(C-5'), 103.85(C-10), 100.95(C-1''), 97.81(C-1'''), 96.75(C-6), 95.64(C-8), 79.18(C-2), 77.64(C-3''), 77.41(C-5''), 76.69(C-2''), 72.34(C-4'''), 70.99(C-2'''), 70.9(C-3'''), 70.11(C-4''), 68.8(C-5'''), 60.95(C-6''), 42.71(C-3), 18.7(C-6'').                                     |
| Compound 13 | C <sub>27</sub> H <sub>32</sub> O <sub>14</sub> ; UPLC/QTOF-MS m/z : 579.1733 [M – H] <sup>–</sup> , ESI/LTQ-Orbitrap-HRMS m/z: 579.1685 [M – H] <sup>–</sup> , <sup>1</sup> H-NMR (600 MHz, DMSO-d <sub>6</sub> ) δ: 7.31(2H,d,J=8.4Hz,H-2', H-6'), 6.82(2H,d,J=7.8Hz,H-3',H-5'), 6.17(1H,d,J=1.8Hz,H-6), 6.15(1H,d,J=2.4Hz,H-8), 5.37-5.35(1H,m,H-2), 5.25-5.24(1H,m,H-1''), 5.10-5.07(1H,m,H-1'''), 3.93-3.30(10H,m,H-6'',5'',5'',3'',2'',2'',4'',4''), 3.15-3.14(1H,m,H-3a), 2.74(1H,d,J=15.6Hz,H-3b), 1.28(1H,d,J=6.6Hz,H-6'''); <sup>13</sup> C-NMR (150 MHz, DMSO-d <sub>6</sub> ) δ: 198.51(C-4), 166.47(C-7), 164.86(C-5), 164.58(C-9), 159.03(C-4'), 103.64(C-1'), 129.16(C-2',6'), 116.38(C-3',5'), 104.89(C-10), 102.44(C-1'''), 99.34(C-6), 97.84(C-8), 96.73(C-1''), 80.60(C-2,4'''), 78.88(C-3''), 78.85(C-3'''), 78.06(C-2''), 73.84(C-5''), 72.10(C--2'''),71.18(C-5'''), 69.92(C-4''), 62.19(C-6''), 44.03(C-3a), 44.79(C-3b), 18.10(C-6'').                                                                |

|             |                                                                                                                                                                                                                                                                                                                                                                                                                                                                                                                                                                                                                                                                                                                                                                                                                                                                                                                                                                                                                                         |
|-------------|-----------------------------------------------------------------------------------------------------------------------------------------------------------------------------------------------------------------------------------------------------------------------------------------------------------------------------------------------------------------------------------------------------------------------------------------------------------------------------------------------------------------------------------------------------------------------------------------------------------------------------------------------------------------------------------------------------------------------------------------------------------------------------------------------------------------------------------------------------------------------------------------------------------------------------------------------------------------------------------------------------------------------------------------|
| Compound 14 | C <sub>28</sub> H <sub>34</sub> O <sub>15</sub> ; ESI/LTQ-Orbitrap-HRMS m/z: 609.1791 [M – H] <sup>–</sup> , <sup>1</sup> H-NMR (600 MHz, DMSO-d <sub>6</sub> ) δ: 12.01(1H,s,5-OH), 6.93(1H,d,J=1.8Hz,H-2'), 6.93(1H,d,J=8.4Hz,H-5'), 6.89(1H,dd,J=2.8Hz,8.4Hz,H-6'), 6.13(1H,d,J=2.4Hz,H-8), 6.11(1H,d,J=3.0Hz,H-6), 5.49 (1H,dd,J=12.0Hz,3.0Hz,H-2), 4.96(1H,d,J=7.2Hz,H-1''), 4.51(1H,brs,H-1'''), 3.76(3H,s,4-OCH <sub>3</sub> ), 3.64-3.10(10H,m,H-2'',3'',4'',5'',6'',2''',3''',4''',5''',3a), 2.76(1H,dd,J=17.4Hz,3.0Hz,H-3b), 1.07(3H,d,J=6.6Hz,H-6); <sup>13</sup> C-NMR (150 MHz, DMSO-d <sub>6</sub> ) δ: 197.02(C-4), 165.12(C-7), 163.02(C-5), 162.49(C-9), 147.95(C-4'), 146.44(C-3'), 130.89(C-1'), 117.94(C-6'), 114.14(C-2'), 112.02(C-5'), 103.31(C-10), 100.60(C-1'''), 99.42(C-1''), 96.37(C-6), 95.53(C-8), 78.36(C-2), 76.25(C-5''), 75.50(C-3''), 72.97(C-5'''), 72.05(C-2'''), 70.69(C-4'''), 70.25(C-2''), 69.57(C-3'''), 68.30(C-4''), 66.02(C-6''), 55.67(4'-OCH <sub>3</sub> ), 42.04(C-3), 17.82(C-6'''). |
|-------------|-----------------------------------------------------------------------------------------------------------------------------------------------------------------------------------------------------------------------------------------------------------------------------------------------------------------------------------------------------------------------------------------------------------------------------------------------------------------------------------------------------------------------------------------------------------------------------------------------------------------------------------------------------------------------------------------------------------------------------------------------------------------------------------------------------------------------------------------------------------------------------------------------------------------------------------------------------------------------------------------------------------------------------------------|

NMR: Nuclear Magnetic Resonance

**Table S2.** Intra-day and Inter-day precision and accuracy of 12 compounds.

| Analyte     | Conc.<br>(µg/mL) | Precision (C.V.%) |           | Accuracy (%) |           |
|-------------|------------------|-------------------|-----------|--------------|-----------|
|             |                  | Intra-day         | Inter-day | Intra-day    | Inter-day |
| Compound 2  | 60               | 1.56              | 0.76      | 98.87        | 97.19     |
|             | 30               | 1.06              | 0.82      | 101.49       | 104.90    |
|             | 15               | 0.70              | 0.82      | 102.78       | 101.51    |
| Compound 3  | 80               | 1.14              | 2.14      | 98.68        | 96.54     |
|             | 40               | 0.18              | 1.39      | 97.13        | 104.75    |
|             | 20               | 1.57              | 0.92      | 99.12        | 100.80    |
| Compound 4  | 80               | 2.07              | 1.64      | 100.10       | 96.54     |
|             | 40               | 0.74              | 1.22      | 99.23        | 102.49    |
|             | 20               | 0.64              | 0.81      | 101.69       | 103.20    |
| Compound 5  | 80               | 2.10              | 1.43      | 100.07       | 96.79     |
|             | 40               | 0.56              | 1.04      | 99.39        | 98.86     |
|             | 20               | 0.30              | 1.02      | 101.41       | 102.12    |
| Compound 7  | 80               | 2.85              | 1.47      | 100.06       | 95.75     |
|             | 40               | 0.75              | 0.88      | 99.48        | 103.35    |
|             | 20               | 1.36              | 1.18      | 100.86       | 102.55    |
| Compound8   | 80               | 2.51              | 2.13      | 99.69        | 95.95     |
|             | 40               | 0.79              | 0.58      | 104.26       | 105.75    |
|             | 20               | 0.82              | 0.89      | 95.03        | 102.76    |
| Compound 9  | 80               | 1.06              | 1.41      | 99.32        | 101.27    |
|             | 40               | 0.78              | 2.37      | 102.15       | 100.33    |
|             | 20               | 0.06              | 1.77      | 104.43       | 102.72    |
| Compound 10 | 80               | 0.56              | 0.73      | 99.95        | 99.03     |
|             | 40               | 0.86              | 0.67      | 100.40       | 100.10    |
|             | 20               | 1.41              | 2.83      | 98.83        | 100.22    |
| Compound 11 | 80               | 1.83              | 0.52      | 100.17       | 98.56     |
|             | 40               | 1.67              | 2.35      | 98.83        | 101.58    |
|             | 20               | 1.72              | 0.37      | 101.99       | 100.76    |
| Compound 12 | 80               | 0.72              | 1.07      | 100.76       | 98.72     |
|             | 40               | 1.04              | 1.65      | 96.56        | 99.27     |
|             | 20               | 1.38              | 1.84      | 98.91        | 101.16    |
| Compound 13 | 80               | 1.61              | 1.68      | 99.85        | 96.61     |
|             | 40               | 0.81              | 1.09      | 99.20        | 99.26     |
|             | 20               | 1.78              | 1.33      | 101.15       | 102.84    |

|             |    |      |      |        |        |
|-------------|----|------|------|--------|--------|
| Compound 14 | 80 | 0.50 | 0.69 | 96.58  | 96.47  |
|             | 40 | 0.90 | 0.99 | 104.75 | 104.12 |
|             | 20 | 0.90 | 0.24 | 100.94 | 102.65 |

Each value was calculated with mean of triplication

**Table S3.** Repeatability of retention time and peak area of 12 compounds.

| Analyte     | Retention time |         | Peak area                               |         |
|-------------|----------------|---------|-----------------------------------------|---------|
|             | Mean (min)     | RSD (%) | Mean ( $\mu\text{V}^2\cdot\text{sec}$ ) | RSD (%) |
| Compound 2  | 7.56           | 0.30    | 2407028                                 | 1.22    |
| Compound 3  | 12.13          | 0.26    | 399648.7                                | 2.23    |
| Compound 4  | 19.32          | 0.33    | 586888.8                                | 1.53    |
| Compound 5  | 20.19          | 0.29    | 542672.8                                | 2.09    |
| Compound 7  | 25.28          | 0.12    | 709714                                  | 1.44    |
| Compound 8  | 28.54          | 0.08    | 182826.2                                | 2.05    |
| Compound 9  | 29.75          | 0.11    | 69236.5                                 | 1.37    |
| Compound 10 | 36.29          | 0.05    | 253620.8                                | 1.82    |
| Compound 11 | 38.00          | 0.07    | 83329.33                                | 2.20    |
| Compound 12 | 38.45          | 0.06    | 421485.3                                | 0.68    |
| Compound 13 | 40.47          | 0.06    | 586656.8                                | 1.17    |
| Compound 14 | 41.00          | 0.06    | 444231.3                                | 1.08    |

Each value was calculated with mean of triplication. RSD : Relative standard deviation

**Table S4.** Recovery of 12 compounds for three different spiked concentrations.

| Analyte    | Spiked concentration<br>( $\mu\text{g/mL}$ ) | Recovery rate<br>(%) |
|------------|----------------------------------------------|----------------------|
| Compound 2 | 5                                            | 103.27               |
|            | 25                                           | 99.71                |
|            | 50                                           | 103.47               |
| Compound 3 | 5                                            | 97.94                |
|            | 25                                           | 99.54                |
|            | 50                                           | 100.81               |
| Compound 4 | 5                                            | 103.05               |
|            | 25                                           | 103.63               |
|            | 50                                           | 103.71               |
| Compound 5 | 5                                            | 103.24               |
|            | 25                                           | 102.20               |
|            | 50                                           | 103.41               |
| Compound 7 | 5                                            | 101.32               |
|            | 25                                           | 100.14               |
|            | 50                                           | 103.96               |
| Compound 8 | 5                                            | 100.67               |
|            | 25                                           | 103.89               |
|            | 50                                           | 103.48               |
| Compound 9 | 5                                            | 100.46               |
|            | 25                                           | 103.65               |
|            | 50                                           | 103.05               |

|             |    |        |
|-------------|----|--------|
| Compound 10 | 5  | 103.92 |
|             | 25 | 103.03 |
|             | 50 | 100.53 |
| Compound 11 | 5  | 102.66 |
|             | 25 | 103.09 |
|             | 50 | 103.44 |
| Compound 12 | 5  | 103.74 |
|             | 25 | 102.74 |
|             | 50 | 100.44 |
| Compound 13 | 5  | 101.33 |
|             | 25 | 103.72 |
|             | 50 | 99.66  |
| Compound 14 | 5  | 101.12 |
|             | 25 | 102.69 |
|             | 50 | 102.78 |

Each value was calculated as mean of triplication
